# Supplementary material for: Aqueous solvation of HgClOH. Stepwise DFT solvation and Born–Oppenheimer molecular dynamics studies of the HgClOH–(H2O)24 complex
Source: Royal Society of Chemistry journal article supplement (doi:10.1039/c3cp55339f), 2014-01-01
Supplement: c3cp55339f1.pdf [file c3cp55339f1.pdf]

**Table 1.** Calibration of the method. Vibrational frequencies ( $\text{cm}^{-1}$ )

## HgClOH

|   | MP2/<br>AVTZ | B3PW91/<br>AVTZ | B3LYP/<br>AVTZ | M06/<br>AVTZ | B971/<br>AVTZ | PBE0/<br>AVTZ |
|---|--------------|-----------------|----------------|--------------|---------------|---------------|
| 1 | 137.9        | 115.0           | 110.6          | 110.6        | 110.9         | 118.8         |
| 2 | 141.8        | 128.7           | 124.5          | 135.8        | 125.1         | 130.6         |
| 3 | 381.8        | 369.8           | 358.7          | 369.9        | 365.1         | 375.8         |
| 4 | 635.5        | 589.2           | 572.3          | 571.1        | 592.2         | 600.3         |
| 5 | 907.4        | 956.5           | 950.3          | 947.0        | 955.5         | 955.5         |
| 6 | 3823.1       | 3837.6          | 3805.5         | 3880.8       | 3839.1        | 3868.7        |

## HgClOH-H<sub>2</sub>O

|    | MP2/<br>AVTZ | B3PW91/<br>AVTZ | B3LYP/<br>AVTZ | M06/<br>AVTZ | B971/<br>AVTZ | PBE0/<br>AVTZ |
|----|--------------|-----------------|----------------|--------------|---------------|---------------|
| 1  | 76.1         | 62.3            | 34.6           | 81.8         | 53.0          | 65.3          |
| 2  | 109.6        | 105.8           | 66.3           | 87.1         | 67.3          | 77.8          |
| 3  | 133.8        | 115.0           | 115.8          | 135.7        | 120.5         | 122.1         |
| 4  | 152.0        | 138.5           | 134.4          | 153.8        | 136.2         | 134.8         |
| 5  | 198.2        | 175.6           | 195.8          | 178.4        | 193.2         | 203.0         |
| 6  | 216.1        | 241.0           | 203.3          | 230.0        | 203.2         | 215.7         |
| 7  | 344.8        | 319.8           | 313.9          | 326.2        | 304.8         | 317.5         |
| 8  | 377.6        | 364.4           | 359.2          | 368.8        | 364.8         | 373.8         |
| 9  | 541.5        | 560.2           | 527.0          | 577.1        | 543.6         | 547.0         |
| 10 | 609.5        | 590.6           | 577.1          | 650.1        | 593.6         | 594.7         |
| 11 | 871.4        | 931.7           | 928.1          | 912.9        | 933.9         | 931.2         |
| 12 | 1614.2       | 1619.0          | 1619.1         | 1609.9       | 1628.8        | 1623.8        |
| 13 | 3733.1       | 3707.3          | 3719.1         | 3753.5       | 3755.5        | 3762.2        |
| 14 | 3847.6       | 3852.3          | 3827.5         | 3900.6       | 3859.3        | 3890.9        |
| 15 | 3911.0       | 3896.7          | 3871.6         | 3939.1       | 3904.7        | 3928.3        |

## HgClOH-(H<sub>2</sub>O)<sub>2</sub>

|    | MP2/<br>AVTZ | B3PW91/<br>AVTZ | B3LYP/<br>AVTZ | M06/<br>AVTZ | B971/<br>AVTZ | PBE0/<br>AVTZ |
|----|--------------|-----------------|----------------|--------------|---------------|---------------|
| 1  | 27.4         | 39.3            | 38.6           | 26.4         | 37.0          | 39.2          |
| 2  | 66.2         | 69.7            | 68.5           | 67.0         | 67.9          | 69.8          |
| 3  | 106.2        | 107.6           | 108.1          | 106.5        | 108.0         | 109.2         |
| 4  | 132.0        | 139.2           | 137.9          | 132.8        | 138.9         | 139.6         |
| 5  | 183.8        | 157.6           | 158.2          | 153.4        | 155.3         | 166.3         |
| 6  | 205.9        | 188.1           | 186.0          | 167.4        | 182.6         | 191.3         |
| 7  | 245.5        | 245.8           | 240.8          | 215.2        | 236.9         | 252.5         |
| 8  | 254.8        | 250.3           | 246.9          | 252.9        | 246.7         | 256.9         |
| 9  | 263.3        | 280.6           | 266.6          | 269.9        | 263.2         | 280.8         |
| 10 | 270.7        | 316.8           | 291.4          | 278.1        | 291.3         | 310.7         |
| 11 | 371.8        | 362.5           | 352.7          | 364.5        | 359.4         | 367.7         |
| 12 | 431.4        | 416.4           | 406.2          | 378.1        | 395.9         | 419.9         |
| 13 | 463.0        | 495.2           | 480.9          | 466.6        | 471.8         | 497.9         |
| 14 | 591.0        | 566.9           | 556.4          | 564.8        | 569.0         | 573.2         |
| 15 | 746.2        | 754.8           | 729.8          | 709.4        | 719.2         | 761.1         |
| 16 | 854.3        | 899.5           | 868.8          | 855.8        | 862.1         | 902.5         |
| 17 | 924.3        | 966.6           | 954.6          | 944.5        | 957.1         | 969.1         |
| 18 | 1627.5       | 1633.4          | 1628.8         | 1606.3       | 1636.5        | 1636.0        |
| 19 | 1662.7       | 1654.9          | 1652.1         | 1635.0       | 1657.5        | 1659.7        |
| 20 | 3414.5       | 3382.6          | 3406.5         | 3505.7       | 3461.3        | 3400.8        |
| 21 | 3494.7       | 3469.9          | 3483.2         | 3584.7       | 3533.2        | 3489.4        |
| 22 | 3850.6       | 3861.3          | 3832.6         | 3904.5       | 3863.9        | 3893.1        |
| 23 | 3887.4       | 3888.6          | 3857.6         | 3925.5       | 3890.2        | 3915.2        |
| 24 | 3896.8       | 3890.9          | 3860.1         | 3934.2       | 3892.6        | 3918.4        |

**Table 2.** B3PW91/6-311G(d,p) HgClOH-(H<sub>2</sub>O)<sub>n</sub> Gibbs water binding free energies at 298K, incremental free binding energies (kcal/mol) and number of direct Hg-O(water) interactions.

| N  | Direct Hg-O <sub>w</sub> interactions <sup>a</sup> | $\Delta G^{\circ}_{298}$ | Incremental energy |
|----|----------------------------------------------------|--------------------------|--------------------|
| 1  | 1                                                  | -0.40                    | -0.40              |
| 2  | 1                                                  | -3.80                    | -3.40              |
| 3  | 1                                                  | -5.75                    | -1.94              |
| 4  | 2                                                  | -6.48                    | -0.73              |
| 5  | 2                                                  | -5.66                    | +0.81              |
| 6  | 2                                                  | -7.78                    | -2.12              |
| 7  | 3                                                  | -9.28                    | -1.50              |
| 8  | 3                                                  | -11.65                   | -2.37              |
| 12 | 3                                                  | -15.08                   | -3.42              |
| 16 | 3                                                  | -20.40                   | -5.33              |
| 20 | 3                                                  | -22.02                   | -1.62              |
| 21 | 3                                                  | -25.34                   | -3.32              |
| 22 | 3                                                  | -28.83                   | -3.49              |
| 23 | 3                                                  | -30.90                   | -2.07              |
| 24 | 3                                                  | -31.42                   | -0.52              |

$$\Delta G^{\circ}_{298}=[G^{\circ}(\text{system with } n \text{ water molecules})-nG^{\circ}(\text{H}_2\text{O})-G^{\circ}(\text{HgClOH})],$$

<sup>a</sup>A water molecule is considered to be directly interacting with Hg if its distance to mercury is less than 2.8 Å.

**Table 3.** B3PW91/6-311G(d,p) optimized geometrical parameters HgClOH-(H<sub>2</sub>O)<sub>n</sub> (n=1 up 24). O<sub>w</sub> label corresponds to the water oxygen atoms directly linked to Hg. Distances in Å, angles in degrees. PCM optimized values in parentheses, see the text.

| <i>n</i> | Hg-Cl          | Hg-O(H)        | Cl-Hg-O(H)       | Hg-O <sub>w</sub> | Hg-O <sub>w</sub> | Hg-O <sub>w</sub> |
|----------|----------------|----------------|------------------|-------------------|-------------------|-------------------|
| 0        | 2.34<br>(2.45) | 1.99<br>(2.05) | 176.6<br>(178.2) |                   |                   |                   |
| 1        | 2.34<br>(2.46) | 2.02<br>(2.08) | 178.8<br>(177.0) | 2.70<br>(3.89)    |                   |                   |
| 2        | 2.35<br>(2.49) | 2.04<br>(2.10) | 173.2<br>(174.4) | 2.53<br>(3.56)    | 3.77<br>(3.62)    |                   |
| 3        | 2.36<br>(2.44) | 2.04<br>(2.10) | 170.8<br>(173.0) | 2.47<br>(3.49)    | 4.18<br>(4.15)    | 4.41<br>(4.73)    |
| 4        | 2.37           | 2.07           | 170.1            | 2.53              | 2.75              | 3.70              |
| 5        | 2.40           | 2.08           | 165.9            | 2.50              | 2.61              | 3.65              |
| 6        | 2.44<br>(2.46) | 2.07<br>(2.08) | 159.3<br>(172.8) | 2.45<br>(3.81)    | 2.61<br>(3.95)    | 3.75<br>(3.96)    |
| 7        | 2.42           | 2.12           | 164.4            | 2.51              | 2.65              | 2.79              |
| 8        | 2.42           | 2.09           | 161.0            | 2.49              | 2.65              | 3.35              |
| 12       | 2.46<br>(2.52) | 2.10<br>(2.15) | 154.2<br>(148.8) | 2.49<br>(2.94)    | 2.51<br>(3.09)    | 3.40<br>(3.61)    |
| 16       | 2.52           | 2.18           | 159.51           | 2.41              | 2.53              | 2.62              |
| 20       | 2.50           | 2.13           | 171.7            | 2.47              | 2.55              | 2.62              |
| 21       | 2.49           | 2.13           | 168.6            | 2.46              | 2.50              | 2.74              |
| 22       | 2.49           | 2.13           | 170.2            | 2.47              | 2.52              | 2.71              |
| 23       | 2.52           | 2.16           | 169.7            | 2.41              | 2.48              | 2.63              |
| 24       | 2.46           | 2.10           | 170.0            | 2.45              | 2.61              | 2.65              |

**Table 4.** B3PW91/6-311G\*\* vibrational frequencies (cm<sup>-1</sup>) for HgClOH-H<sub>2</sub>O complex *in vacuo* and with the PCM scheme with water as continuous solvent.

| Mode | B3PW91/6-311G** | B3PW91-PCM/6-311G** |
|------|-----------------|---------------------|
| 1    | 79              | 45                  |
| 2    | 111             | 68                  |
| 3    | 128             | 107                 |
| 4    | 174             | 128                 |
| 5    | 207             | 253                 |
| 6    | 257             | 270                 |
| 7    | 354             | 284                 |
| 8    | 363             | 444                 |
| 9    | 546             | 463                 |
| 10   | 651             | 797                 |
| 11   | 927             | 893                 |
| 12   | 1627            | 1668                |
| 13   | 3717            | 3395                |
| 14   | 3872            | 3844                |
| 15   | 3907            | 3888                |
